# Supplementary material for: Hole-Type Spacers for More Stable Shale Gas-Produced Water Treatment by Forward Osmosis
Source: MDPI journal article supplement (doi:10.3390/membranes11010034), 2021-01-03
Supplement: s1 [file s1]

## Supplementary Materials

# Hole-type spacer for more stable shale gas produced water treatment by forward osmosis

Jawad AlQattan <sup>1</sup>, Youngjin Kim <sup>1,2</sup>, Sarah Kerdi <sup>1,\*</sup>, Adnan Qamar <sup>1</sup>, Noredine Ghaffour <sup>1</sup>

<sup>1</sup> King Abdullah University of Science and Technology (KAUST), Water Desalination and Reuse Center (WDRC), Thuwal 23955-6900, Saudi Arabia

<sup>2</sup> Department of Environmental Engineering, Sejong Campus, Korea University, 2511, Sejong-ro, Jochiwon-eup, Sejong-si, Republic of Korea

\* Correspondence: [sarah.kerdi@kaust.edu.sa](mailto:sarah.kerdi@kaust.edu.sa)

**Table S1.** FO membrane characteristics.

| Parameter   | Values   |
|-------------|----------|
| A (LMH/bar) | 1.31     |
| B (LMH)     | 1.80     |
| S (m)       | 0.000463 |

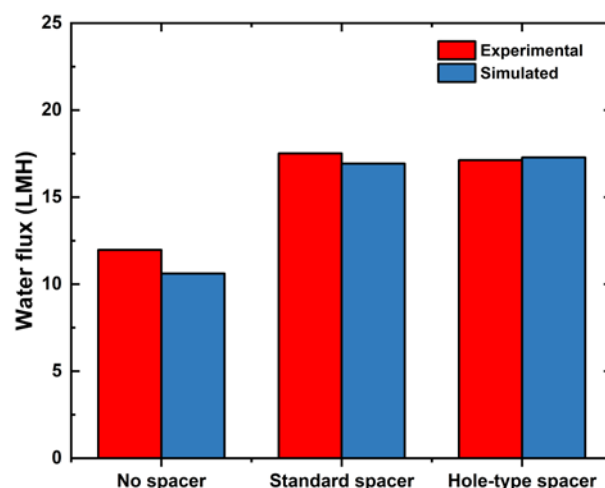

**Figure S1.** Experimental and simulated water fluxes produced by using 0.3 M NaCl as FS and 1.2 M NaCl as DS.

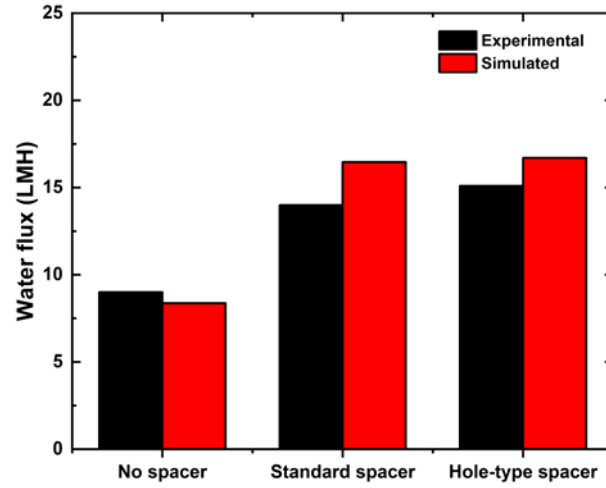

**Figure S2.** Experimental and simulated water flux produced by using synthetic shale gas produced water as FS and 5 M NaCl as DS.
